# Supplementary material for: Profile of bile acid subspecies is similar in blood and follicular fluid of cattle
Source: PubMed Central journal article supplement (PMC7196682; doi:10.1002/vms3.217), 2019-11-11
Supplement: VMS3-6-167-s001.pdf [file VMS3-6-167-s001.pdf]

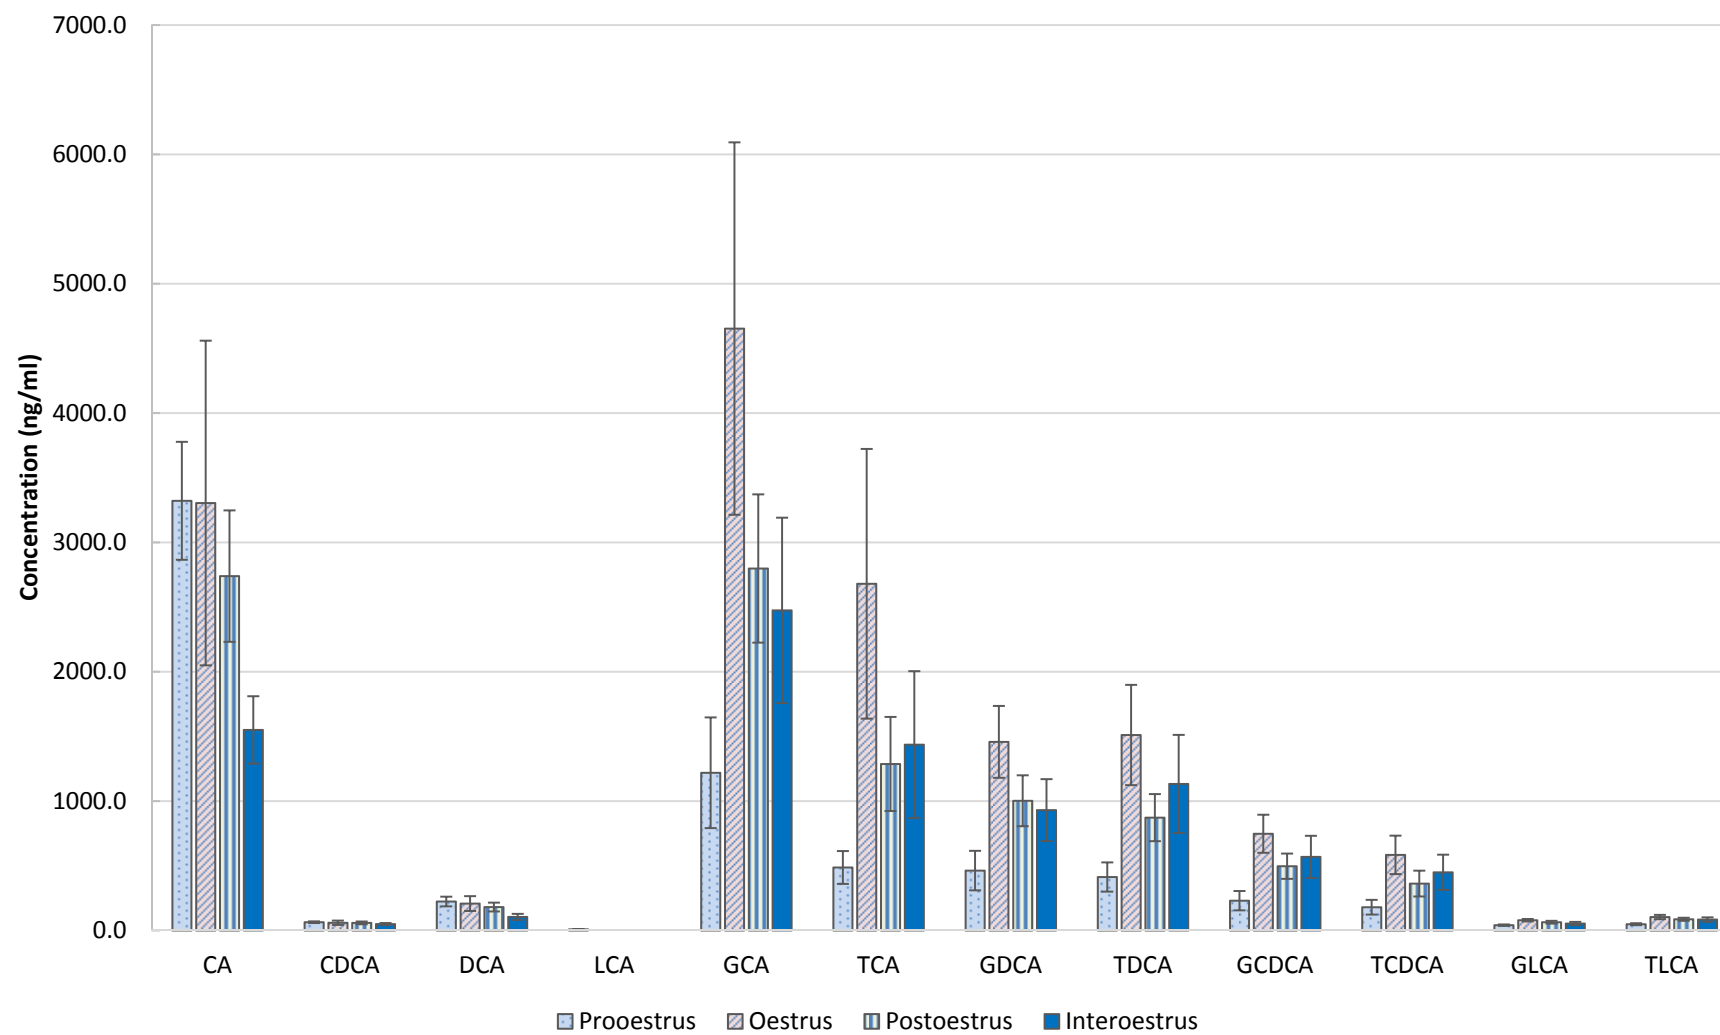

**Supplemental Figure 1:**  
 Concentration (ng/ml) of BA derivatives in serum during the physiological oestrus cycle. The results are shown as mean  $\pm$  SEM.
